# Supplementary material
Source: ML conference proceedings conference paper supplement (https://openreview.net/forum?id=AxCdB1dfKm1)
Supplement: supplementary_material [file attachment]

# Interview Questions 2021

## **General Introductory**

How has life changed for you in the last year? Walk me through a day in your life as a researcher/student.

- How and how often do you use video to communicate with other people?
- Walk me through your last video call.
- In what ways do you find video to be different from in-person face-to-face?

## **Self-presentation and Professionalism**

How do you prepare to have a video conversation?

- Prompt: background/choose a virtual background
- Walk me through the preparation for a video call.

How do you convey your professionalism in video calls? What does a professional demeanor mean/look like for you?

- Does your appearance contribute to your (professional) demeanor?
- Has this changed since the start of the pandemic?
- Aside from your appearance, how else do you convey your professionalism?

What about yourself or your living space do you feel is appropriate and professional (or beneficial) to present in calls?

What is the difference between having personal items decorating your desk at work (physical office) and having personal items in the background of your call?

Compared to in-person and in-office meetings, what specifically has changed for you as a working professional?

If you had unlimited resources, would you change your video feed? If so, how?

## **Self-view**

How do you use the self-view window?

In what situations or types of meetings are you more inclined to check the self-view window? In what situations would you avoid it?

Do you use the self view window to help you maintain a professional appearance?

How do you decide when to turn the camera on or off?

- How do you feel about seeing your own video feed while talking?
- How do you feel about others seeing your video feed in meetings?
- How would you feel if others notice you looking at your self-view?

Does having access to the self-view affect your self-esteem?

### **Video Call Fatigue**

Popular media, like the news, have been discussing the potential for video calling to be exhausting for individuals moving from an in-person to a WFH setup.

- Have you experienced video call fatigue?
- Have you noticed this fatigue in others?
- What factors contribute to fatigue in your experience?

### **Recording/Interview**

How do you feel about meetings being recorded? Do you communicate differently or the same, knowing that a meeting is recorded?

Do you ever go back to rewatch a recorded meeting? If so, why? What do you take away from rewatching?

### **Communication Techniques**

What conversation techniques do you feel you leverage in-person or on video calls? Does the amount of use of these techniques vary based on the modality of the conversation?

How do you mediate the use of non-verbal communication techniques in video conferencing?

Does the self view feature detract or increase your use of non-verbal communication? Or attentiveness to others' non-verbal communication?

Is your ability to gauge, evaluate, and self-regulate emotions during conversations affected the video call medium?

### **Participation/Presence**

- How do you decide if you attend meetings online or in-person?
  - How do you communicate your preference for the meeting format to others? If the format is not your preference, how do you react?
  - If you had a choice, which do you prefer and why?
- Does the content/people/importance of the meeting change your preference for the meeting type?

### **Self-View/Camera**

- How do you feel about the absence of the camera in in-person meetings?
- How do you feel about seeing your own video feed?
  - Do you use the self-view differently now compared to the start of transitioning to online?
  - Do you miss having this feature in-person?
- How do you decide when to turn your camera on or off? Has this changed since the start of the pandemic?
  - Are there moments in online meetings when you are unsure if you should turn your camera on or off? Please describe.

### **New normal/culture**

- How do you feel about others turning their camera on or off?
- Are there any rules of conduct or norms that are established for video calling?
  - What rules do you think should be established?
  - Does group size matter?
- Have any in-person meeting rules of conduct changed? Should they?
- How has your view of collaboration changed over the pandemic?
- How has your view of others changed over the pandemic?
  - Prompt: do you feel more sympathetic to the diversity in people's lives?
    - Age group, ability, caregiver/parent responsibilities, etc.
